# Supplementary material
Source: PubMed Central journal article supplement (PMC6728556)
Supplement: Supplementary_Tables.pdf [file Supplementary_Tables.pdf]

**Supplementary table 1: Patient demographics (deliveries of twins).**

|                        | <b>0 CL</b> | <b>1 CL</b> | <b>Multiple CL<br/>non-IVF</b> | <b>Multiple CL<br/>IVF</b> |
|------------------------|-------------|-------------|--------------------------------|----------------------------|
| n                      | 8           | 3           | 10                             | 7                          |
| Median Participant Age | 37.0        | 36.6        | 38.1                           | 35.6                       |
| Range                  | 32.3-45.3   | 35.5-39.4   | 28.4-38.7                      | 35.4-42.7                  |
| Participant Race       |             |             |                                |                            |
| Asian                  | 3           | 2           | 4                              | 3                          |
| African American       |             |             |                                | 1                          |
| White                  | 5           |             | 6                              | 3                          |
| Other                  |             | 1           |                                |                            |
| Median Partner Age     | 44.5        | 37.5        | 38.6                           | 37.2                       |
| Range                  | 32.0-46.9   | 35.6-38.4   | 29.2-55.5                      | 35.4-45.2                  |
| Partner Race           |             |             |                                |                            |
| Asian                  | 2           | 3           | 3                              | 2                          |
| African American       | 1           |             |                                |                            |
| White                  | 5           |             | 5                              | 5                          |
| Unknown                |             |             | 2                              |                            |

**Supplementary table 2:** Hormone levels of pregnancies with deliveries of twins (median, 25th and 75<sup>th</sup> percentile).

|                         | <b>0 CL</b>             | <b>1 CL</b>             | <b>Multiple CL<br/>non-IVF</b> | <b>Multiple CL<br/>IVF</b> | <b>p-<br/>value</b> |
|-------------------------|-------------------------|-------------------------|--------------------------------|----------------------------|---------------------|
| n                       | 8                       | 3                       | 10                             | 7                          |                     |
| Relaxin<br>(pg/ml)      | n.d.                    | 121.0<br>(104.0, 181.5) | 401.5<br>(226.9, 620.0)        | 1108.0<br>(375.0, 1403)    | <0.001              |
| Progesterone<br>(ng/ml) | 5.2<br>(4.4, 10.2)      | 25.7<br>(20.9, 39.3)    | 39.2<br>(32.6, 50.8)           | 78.2<br>(52.5, 161.0)      | <0.001              |
| Estradiol<br>(pg/ml)    | 229.8<br>(189.4, 295.5) | 358.0<br>(323.0, 374.0) | 247.5<br>(172.0, 320.0)        | 861.0<br>(765.5, 1387.0)   | 0.02                |

n.d.: not detectable

**Supplementary table 3:** Concentrations of serum electrolytes and other parameters in pregnancies with twins (median, 25<sup>th</sup> and 75<sup>th</sup> percentile).

|                            | <b>0 CL</b>             | <b>1 CL</b>             | <b>Multiple CL<br/>non-IVF</b> | <b>Multiple CL<br/>IVF</b> | <b>p-<br/>value</b> |
|----------------------------|-------------------------|-------------------------|--------------------------------|----------------------------|---------------------|
| n                          | 7                       | 2                       | 7                              | 5                          |                     |
| Glucose<br>mg/dL           | 93.0<br>(84.0, 95.5)    | 100.5<br>(97.3, 103.8)  | 87.0<br>(77.0, 96.0)           | 95.0<br>(84.0, 99.0)       | 0.68                |
| BUN<br>mg/dL               | 11.0<br>(9.5, 12.5)     | 10.0<br>(10.0, 10.0)    | 9.0<br>(8.5, 11.5)             | 12.0<br>(10.0, 14.0)       | 0.52                |
| Ca <sup>2+</sup><br>mg/dL  | 9.2<br>(9.2, 9.5)       | 9.7<br>(9.7, 9.8)       | 9.5<br>(9.4, 9.6)              | 9.7<br>(9.6, 10.1)         | 0.20                |
| Creatinine<br>mg/dL        | 0.9<br>(0.8, 10)        | 0.6<br>(0.5, 0.7)       | 0.6<br>(0.6, 0.7)              | 0.6<br>(0.6, 0.7)          | 0.09                |
| Na <sup>+</sup><br>mmol/L  | 140.0<br>(137.5, 142.5) | 139.5<br>(139.2, 139.8) | 137.0<br>(136.5, 140.5)        | 141.0<br>(138.0, 151.0)    | 0.56                |
| K <sup>+</sup><br>mmol/dL  | 4.5<br>(4.3, 4.8)       | 4.7<br>(4.7, 4.8)       | 4.6<br>(4.3, 4.8)              | 4.6<br>(4.5, 5.6)          | 0.67                |
| Cl <sup>-</sup><br>mmol/dL | 103.0<br>(102.5, 103.0) | 105.5<br>(105.2, 105.8) | 104.0<br>(101.5, 105.5)        | 108.0<br>(106.0, 115.0)    | 0.07                |
| tCO <sub>2</sub><br>mmol/L | 30.0<br>(30.0, 31.5)    | 28.0<br>(27.5, 28.5)    | 28.0<br>(27.5, 28.0)           | 30.0<br>(29.0, 31.0)       | 0.03                |
